# Supplementary material
Source: Springer Nature journal article supplement (https://www.springermedizin.de/resource/supplementary/12885_2010_2490_MOESM5_ESM.pdf/9461434)

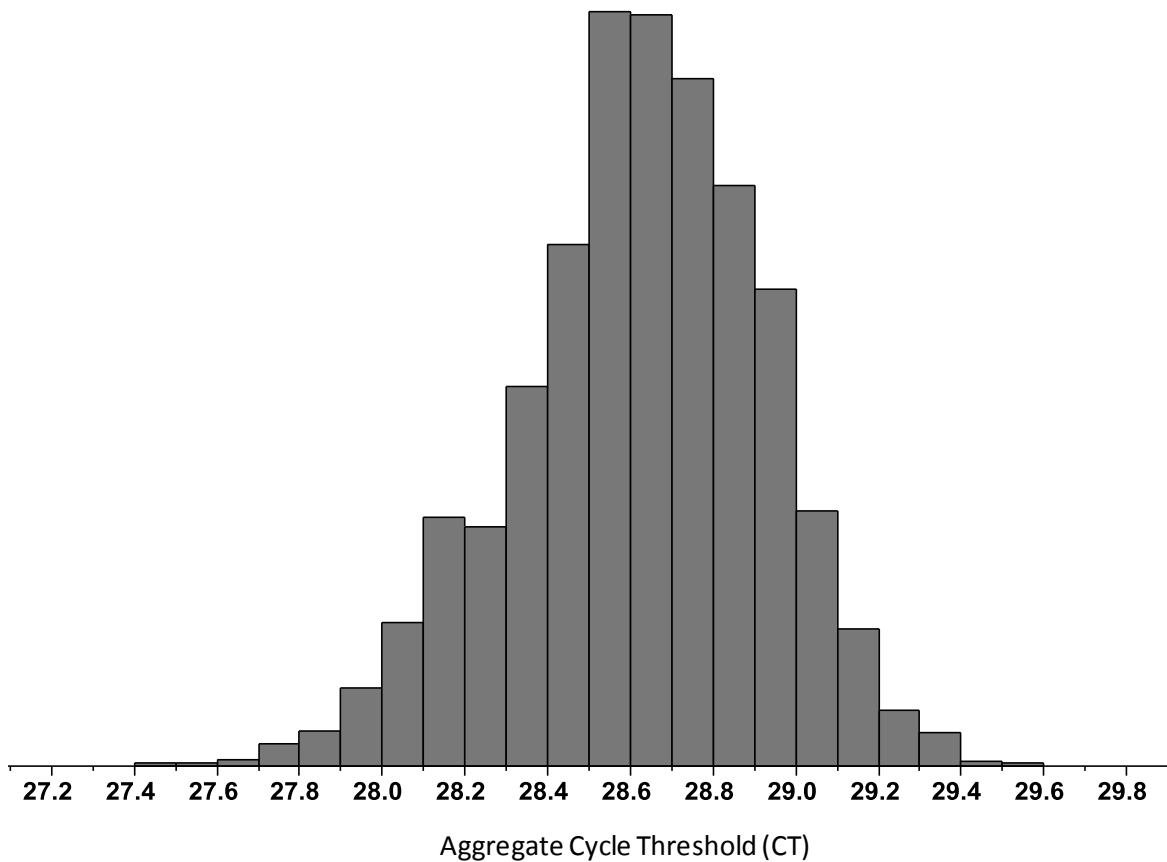

Supplement: MOESM5 [file 9461434]
